# Supplementary material for: Metabolites of traffic-related volatile organic compounds in age-related macular degeneration
Source: PeerJ. 2025 Dec 3;13:e20405. doi: 10.7717/peerj.20405 (PMC12681231; doi:10.7717/peerj.20405)
Supplement: Supplemental Information 5 [file peerj-13-20405-s005.xlsx]

## Sheet: data
			%Status	Result	%Status	Result	%Status	Result	%Status	Result	%Status	Result	%Status	Result
			2-Methylhippurate	2-Methylhippurate	3-Methylhippurate	3-Methylhippurate	Mandelate	Mandelate	Phenylglyoxylate	Phenylglyoxylate	M＋P	M＋P	t,t-Muconic Acid	t,t-Muconic Acid
		Control	1.95396	3.12	-34.9852	0.04	40.8498	0.24	31.1308	0.31	71.9806	0.55	-27.616	0
		Control	-8.29806	2.43	-9.268	0.1	-42.1779	0.03	15.286	0.25	-26.8919	0.28	-24.0365	0.005
		Control	-13.0526	2.11	-30.699	0.05	-34.2705	0.05	7.3636	0.22	-26.9069	0.27	-16.8775	0.015
		Control	11.3145	3.75	7.8768	0.14	-50.0853	0.01	4.7228	0.21	-45.3625	0.22	1.02	0.04
		Control	18.7435	4.25	55.025	0.25	-22.4094	0.08	-8.4812	0.16	-30.8906	0.24	-9.7185	0.025
		Control	-14.0927	2.04	85.0284	0.32	-2.6409	0.13	-5.8404	0.17	-8.4813	0.3	-20.457	0.01
		Control	0.9139	3.05	123.604	0.41	-10.5483	0.11	-19.0444	0.12	-29.5927	0.23	-13.298	0.02
		Control	-16.9157	1.85	-26.4128	0.06	-26.3631	0.07	-11.122	0.15	-37.4851	0.22	-6.139	0.03
		Control	0.02242	2.99	-22.1266	0.07	-46.1316	0.02	-29.6076	0.08	-75.7392	0.1	1.02	0.04
		Control	18.1492	4.21	37.8802	0.21	-30.3168	0.06	20.5676	0.27	-9.7492	0.33	15.338	0.06
		cataract	-10.5268	2.28	-4.9818	0.11	-38.2242	0.04	17.9268	0.26	-20.2974	0.3	-13.298	0.02
		cataract	-23.6018	1.4	3.5906	0.13	-34.2705	0.05	-8.4812	0.16	-42.7517	0.21	-6.139	0.03
		cataract	-31.7737	0.85	-26.4128	0.06	-10.5483	0.11	46.9756	0.37	36.4273	0.48	1.02	0.04
		cataract	67.18	6.89	-16.67	0.1	66	0.29	41.89	0.34	64.55	0.63	-14.29	0.05
		cataract	171.43	13.02	13.33	0.19	14	0.16	36.49	0.32	37.27	0.48	-28.57	0.03
		cataract	10.42	4.35	271.74	0.74	-27.42	0.07	-25	0.1	-23.44	0.17	-22.73	0.03
		cataract	-12.76	2.19	140	0.57	6	0.14	90.54	0.52	70	0.66	42.86	0.13
		cataract	-39.12	0.64	-23.33	0.08	14	0.16	-1.35	0.18	11.82	0.34	28.57	0.11
		cataract	-30	1.44	28.57	0.22	-1.61	0.15	-2.5	0.19	3.13	0.34	50	0.11
		cataract	-50	0.04	-16.67	0.05	-26.92	0.06	-25	0.1	-25	0.16	-38.24	0.02
		AMD	208.84	15.22	236.67	0.86	142	0.48	79.73	0.48	124.55	0.96	-14.29	0.05
		AMD	10.97	4.39	-41.3	0.02	-30.65	0.06	-30	0.08	-28.13	0.14	-31.82	0.02
		AMD	-46.53	0.25	-45.65	0.01	-37.1	0.04	-42.5	0.03	-39.06	0.07	-40.91	0.01
		AMD	141.39	13.78	-23.91	0.06	14.52	0.2	17.5	0.27	23.44	0.47	-22.73	0.03
		AMD	44.73	5.57	-33.33	0.05	18	0.17	-9.46	0.15	8.18	0.32	7.14	0.08
		AMD	-49.03	0.07	-45.65	0.01	-46.77	0.01	-45	0.02	-45.31	0.03	-50	0
		AMD	58.33	6.37	-36.67	0.04	114	0.41	-4.05	0.17	55.45	0.58	7.14	0.08
		AMD	58.33	6.37	-36.67	0.04	114	0.41	-4.05	0.17	55.45	0.58	7.14	0.08
		AMD	172.11	13.06	-16.67	0.1	102	0.38	55.41	0.39	90	0.77	-14.29	0.05
		AMD	225.14	19.81	-41.3	0.02	82.26	0.41	30	0.32	64.06	0.73	4.55	0.06
		AMD	68.2	6.95	-20	0.09	6	0.14	1.35	0.19	10	0.33	-35.71	0.02
		AMD	88.1	8.12	-26.67	0.07	50	0.25	58.11	0.4	68.18	0.65	-28.57	0.03
		AMD	78.23	7.54	-20	0.09	54	0.26	17.57	0.25	42.73	0.51	7.14	0.09
		AMD	18.19	4.91	1315.22	3.14	4.84	0.17	-5	0.18	4.69	0.35	4.55	0.08
		AMD	31.63	4.8	66.67	0.25	58	0.27	9.46	0.22	39.09	0.49	-21.43	0.04
		AMD	25	0.03	3.33	0.08	0	0.13	7.5	0.23	6.25	0.36	-26.47	0.04
		AMD	275	0.13	236.67	0.43	61.54	0.29	40	0.36	50	0.64	-2.94	0.08
		AMD	0	0.02	-16.67	0.05	3.85	0.14	15	0.26	14.06	0.41	-20.59	0.05
		AMD	141.39	13.78	-23.91	0.06	14.52	0.2	17.5	0.27	23.44	0.47	-22.73	0.03
		AMD	38.61	5.21	83.33	0.4	38	0.22	20.27	0.26	37.27	0.48	0	0.07
		AMD	29.72	5.74	-28.26	0.05	-4.84	0.14	-15	0.14	-6.25	0.28	-22.73	0.03
		AMD	47.79	5.75	-40	0.03	70	0.3	-17.57	0.12	26.36	0.42	-28.57	0.03
		AMD	60.2	6.48	3.33	0.16	22	0.18	-14.86	0.13	6.36	0.31	-28.57	0.03
		AMD	64.17	8.22	-15.22	0.08	-11.29	0.12	-22.5	0.11	-14.06	0.23	-31.82	0.02
		AMD	41.5	5.38	6.67	0.17	110	0.4	17.57	0.25	68.18	0.65	14.29	0.09
		AMD	82.5	9.54	-36.96	0.03	-4.84	0.14	5	0.22	6.25	0.36	-13.64	0.04
		AMD	73.64	7.27	-3.33	0.14	74	0.31	-1.35	0.18	39.09	0.49	-7.14	0.06
		AMD	37.07	5.12	-20	0.09	10	0.15	1.35	0.19	11.82	0.34	-7.14	0
		AMD	170.24	12.95	286.67	1.01	226	0.69	74.32	0.46	159.09	1.15	35.71	0.12
		AMD	7.64	4.15	93.48	0.33	62.9	0.35	80	0.52	85.94	0.87	22.73	0.08
		AMD	78.23	7.54	-46.67	0.01	-6	0.11	14.86	0.24	13.64	0.35	-28.57	0.03
		AMD	18.19	4.91	1315.22	3.14	4.84	0.17	-5	0.18	4.69	0.35	4.55	0.08
		AMD	-23.3	1.57	20	0.21	-10	0.1	-6.76	0.16	-2.73	0.26	7.14	0.08
		AMD	25	0.03	-10	0.06	46.15	0.25	22.5	0.29	34.38	0.54	-26.47	0.04
		AMD	275	0.13	150	0.3	69.23	0.31	10	0.24	35.94	0.55	-20.59	0.05
		AMD	75	0.05	70	0.18	180.77	0.6	45	0.38	101.56	0.97	-44.12	0.01
		AMD	25	0.03	-16.67	0.05	11.54	0.16	-15	0.14	-1.56	0.31	-20.59	0.05
		AMD	45.42	6.87	-15.22	0.08	20.97	0.22	15	0.26	25	0.48	68.18	0.13
		AMD	31.29	4.78	-43.33	0.02	2	0.13	-22.97	0.1	-8.18	0.23	0	0.07
		AMD	41.11	6.56	180.43	0.53	33.87	0.26	-15	0.14	12.5	0.4	13.64	0.07
