# Supplementary material for: Metabolites of traffic-related volatile organic compounds in age-related macular degeneration
Source: PeerJ. 2025 Dec 3;13:e20405. doi: 10.7717/peerj.20405 (PMC12681231; doi:10.7717/peerj.20405)
Supplement: Supplemental Information 7 [file peerj-13-20405-s007.xlsx]

## Sheet: Sheet1
	Itabashi	Itabashi	Itabashi	Nerima	Nerima	Nerima					Regular gasoline	High-octane gasoline
Year	2019	2020	2021	2019	2020	2021				Benzene (%)	0.65	0.66
Benzene	0.88	0.7	0.83	0.81	0.66	0.78				Ethylbenzene (%)	1.1	1.4
Trichloroethylene	1.2	0.63	0.85	0.87	0.56	0.98				Xylene (%)	4.7	5.7
Tetrachloroethylene	0.31	0.19	0.18	0.24	0.17	0.25				Toluene (%)	9	23
Dichloromethane	1.7	1.2	1.6	1.6	1.3	1.7				Hexane (%)	3.9	1.1
Acrylonitrile	0.11	0.06	0.12	0.09	0.06	0.09				Trimethylbenzene (%)	4.3	6.2
Vinyl chloride monomer	0.055	0.03	0.03	0.041	0.02	0.03				Heptane (%)	1.5	-
Chloroform	0.26	0.2	0.26	0.29	0.21	0.24
1,2-Dichloroethane	0.14	0.12	0.12	0.12	0.12	0.11
1,3-Butadiene	0.24	0.09	0.1	0.18	0.07	0.1					https://www.eneos.co.jp/business/sds/gasoline/pdf/00102_r.pdf
Ethylene oxide	0.086	0.071	0.076	0.077	0.065	0.066					https://www.eneos.co.jp/business/sds/gasoline/pdf/00001_r.pdf
Methyl chloride	1.3	1.4	1.4	1.3	1.4	1.5
Toluene	8.2	6.8	6.9	7.2	4.9	5.7
https://www.kankyo.metro.tokyo.lg.jp/air/air_pollution/gas/monitoring_study
